# Supplementary material
Source: Springer Nature journal article supplement (https://www.springermedizin.de/resource/supplementary/12979_2012_157_MOESM3_ESM.pdf/9603102)
Supplement: MOESM3 [file 9603102]

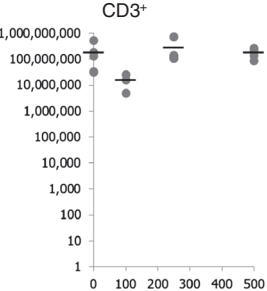

Amount (μl) of donor blood injected

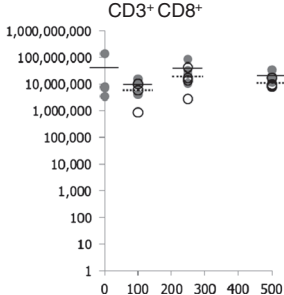

Amount (μl) of donor blood injected

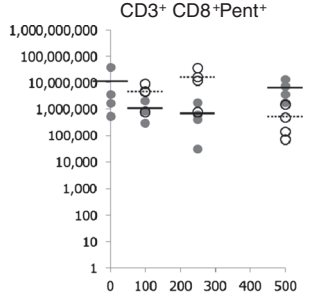

Amount (μl) of donor blood injected
